# Supplementary material for: „Expositions(E)-Probleme“ des nichttraumatologischen Schockraummanagements
Source: Springer Nature journal article supplement (doi:10.1007/s10049-023-01141-0), 2023-04-17
Supplement: MOESM1 [file 25252182]

**Zusatzmaterial zum Beitrag „E-Probleme“ des nichttraumatologischen Schockraummanagements**  
von Kumle B, Michael M, Kümpers P et al. (2023) in Notfall+Rechtungsmedizin.

Beitrag und Zusatzmaterial stehen Ihnen auf [www.springermedizin.de](http://www.springermedizin.de) zur Verfügung. Bitte geben Sie dort den Beitragstitel in die Suche ein.

---

**Abb. S1 Rötung (Erythem) am rechten Knie**

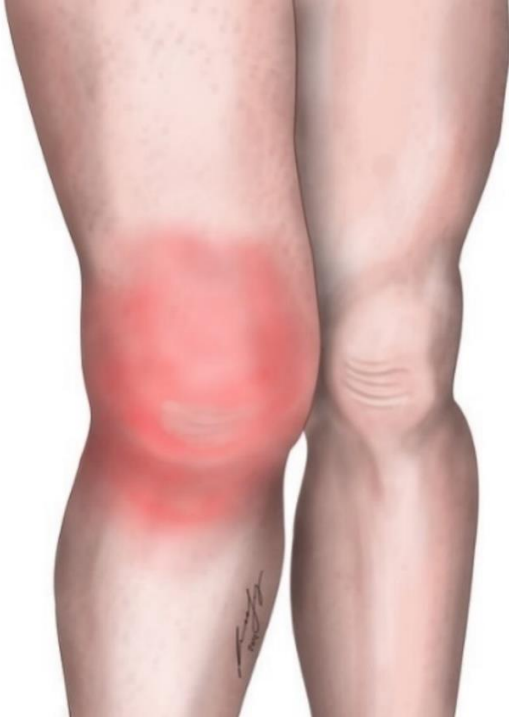

(© all rights reserved, mit freundlicher Genehmigung N. Hammer, Graz)

**Abb. S2 Petechiale Einblutungen in der Ellbeuge**

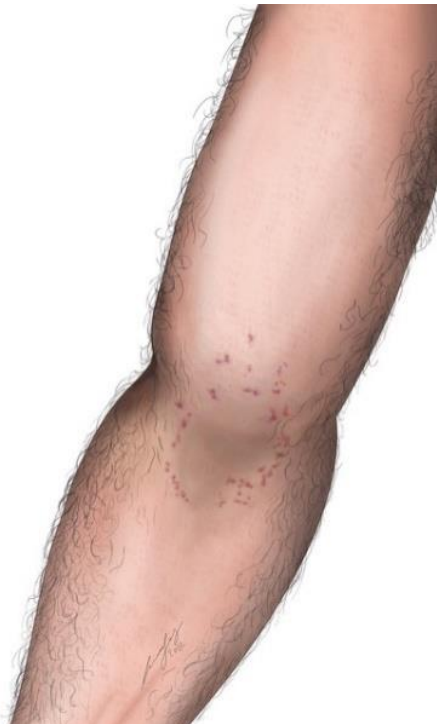

(© all rights reserved, mit freundlicher Genehmigung N. Hammer, Graz)

**Abb.S3**      **Disseminierte intravasale Gerinnung bei Capnozytophagen-Infektion**

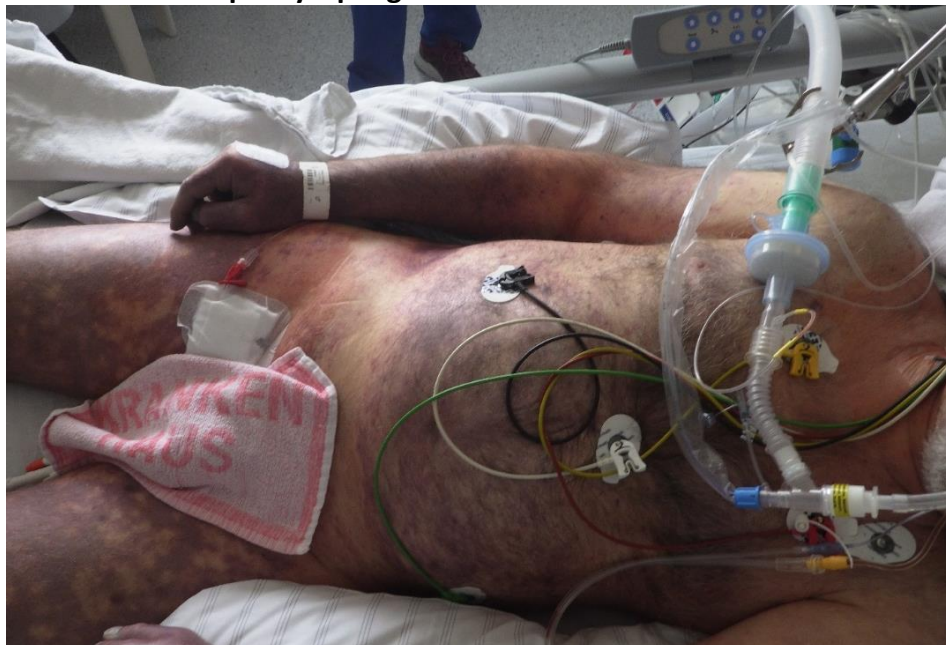

(© all rights reserved, mit freundlicher Genehmigung B.Kumle)

**Abb. S4**      **Hauteinblutungen (Purpura) bei foudroyanter Sepsis**

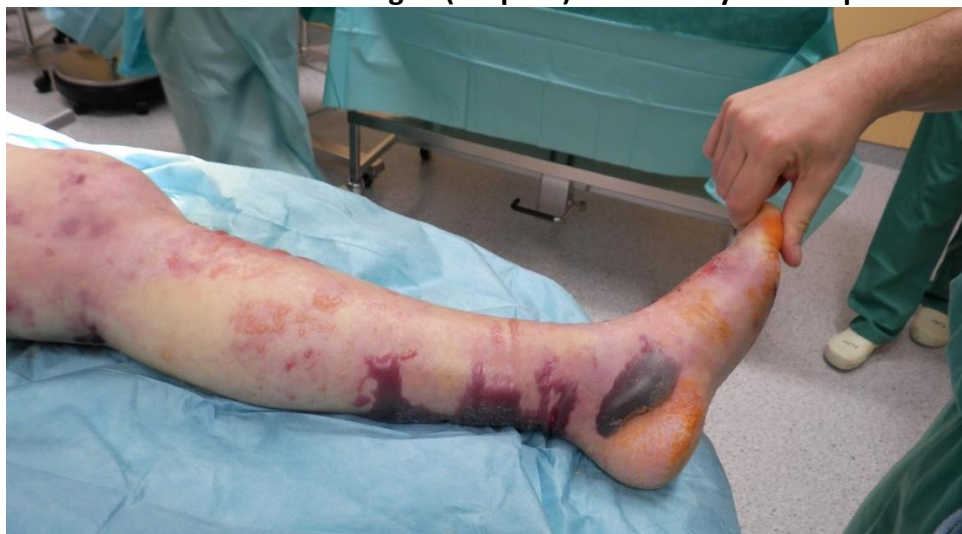

(© all rights reserved, mit freundlicher Genehmigung B.Kumle)

**Abb. S5 nekrotisierende Infektion des äußeren Genitals  
(Fournier-Gangrän)**

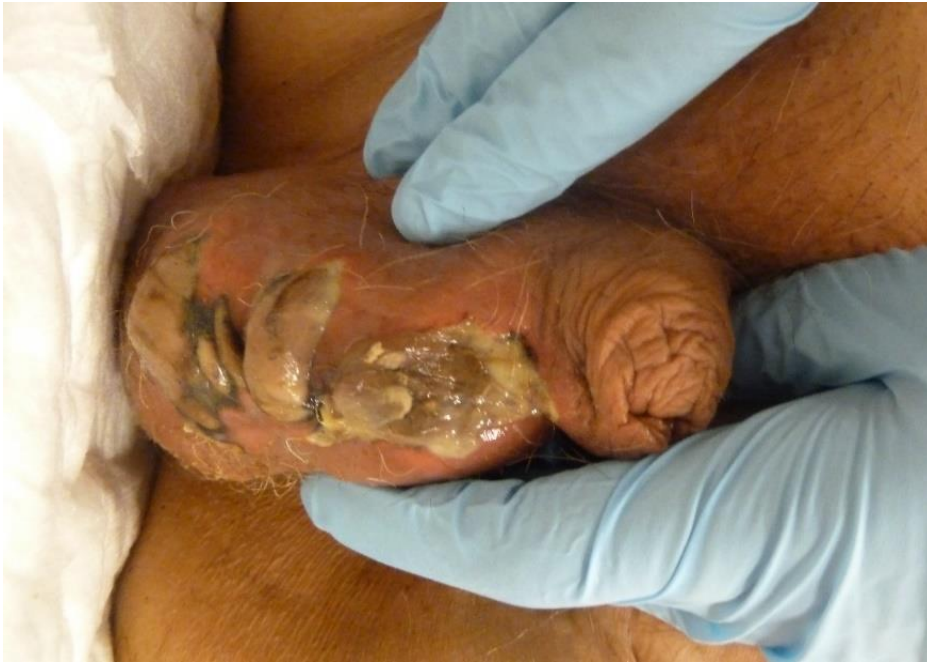

(© all rights reserved, mit freundlicher Genehmigung B.Kumle)

**Abb. S6 Mazeration und Nekrosen bei peripherer arterielle Verschlusskrankheit**

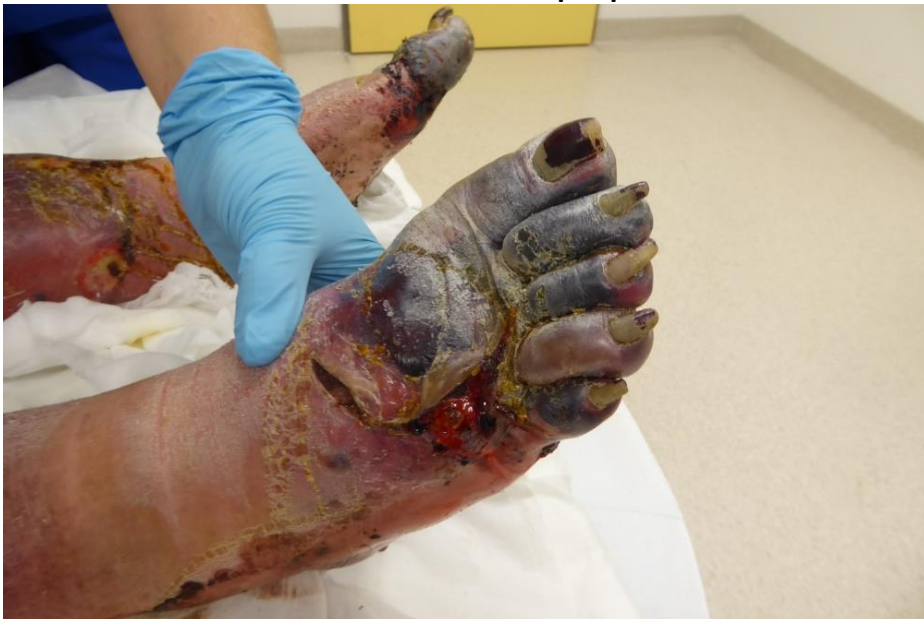

(© all rights reserved, mit freundlicher Genehmigung B.Kumle)

**Abb. S7a+b** Erfrierungen mit Nekrosen Grad 3 (a) und Blasenbildung (b) bei Grad 2

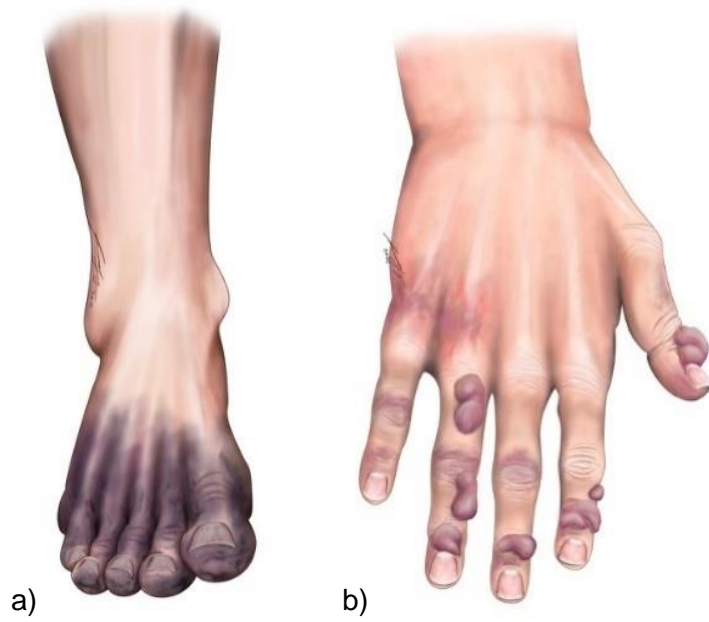

(© all rights reserved, mit freundlicher Genehmigung N. Hammer, Graz)

**Abb. S8** Nadeleinstichstellen

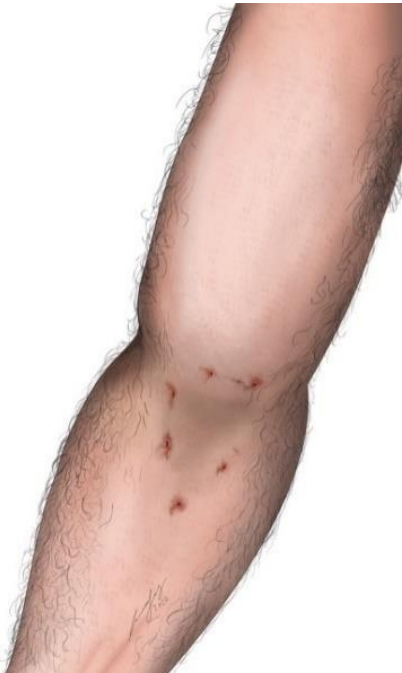

(© all rights reserved, mit freundlicher Genehmigung N. Hammer, Graz)

**Abb. S9 Nekrotisierender Dekubitus bei Pflegebedürftigkeit**

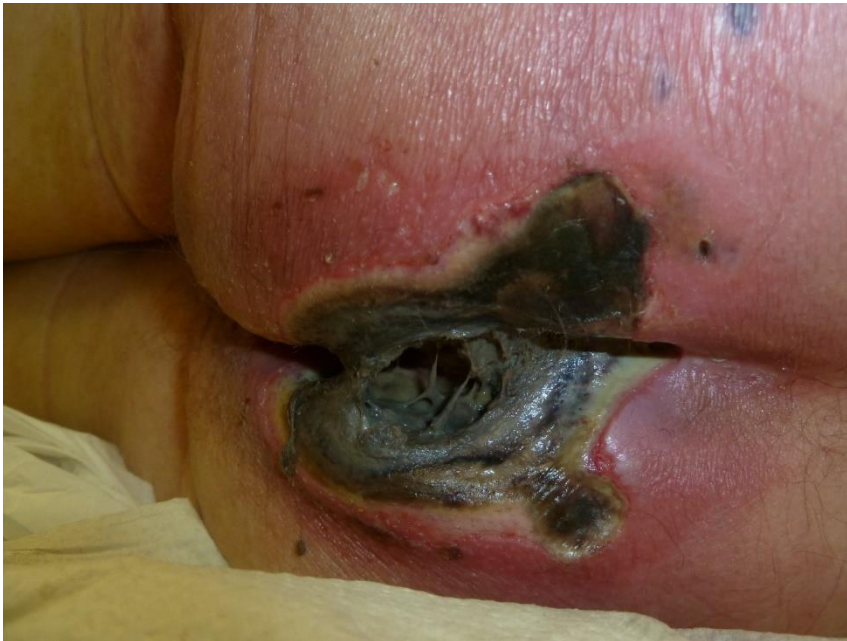

(© all rights reserved, mit freundlicher Genehmigung B. Kumle)

**Abb. S10a+b Kontakt mit Starkstrom – Strommarken Eintritt (a), Austritt (b)**

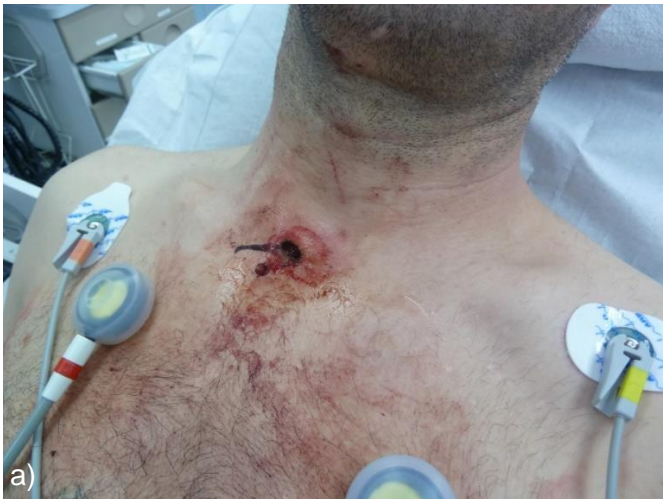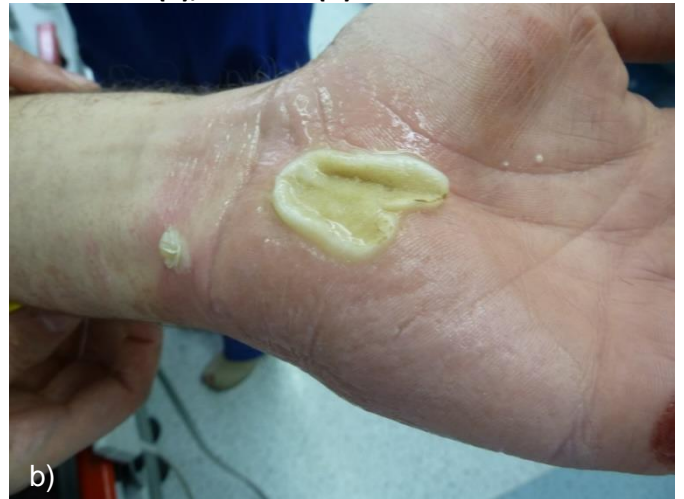

(© all rights reserved, mit freundlicher Genehmigung B. Kumle)

**Abb.S11 Liegetrauma mit suizidalen Stichverletzungen und sekundärem Madenbefall**

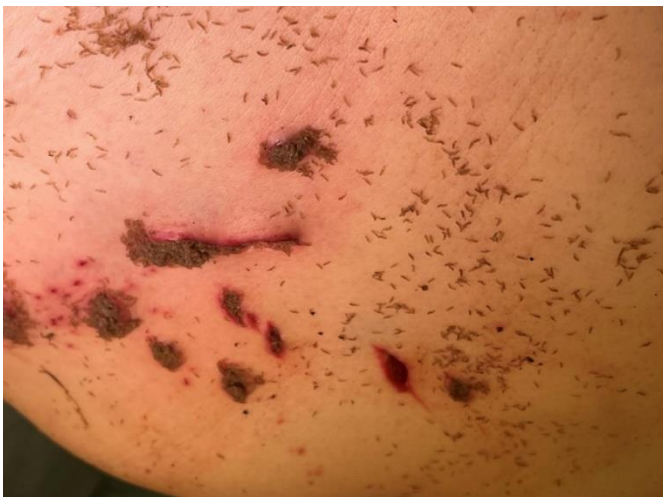

(© all rights reserved, mit freundlicher Genehmigung B. Kumle)
